# Supplementary material for: Twinning and its formation mechanism in a binary Mg2Si thermoelectric material with an anti-fluorite structure
Source: Royal Society of Chemistry journal article supplement (doi:10.1039/c7ra00541e), 2017-01-01
Supplement: c7ra00541e1.pdf [file c7ra00541e1.pdf]

## Electronic Supplementary Information

### Twinning and its formation mechanism in binary $\text{Mg}_2\text{Si}$ thermoelectric material with anti-fluorite structure

Jeong In Jang,<sup>a,b</sup> Ji Eun Lee,<sup>b</sup> Bong-Seo Kim,<sup>b</sup> Su-Dong Park,<sup>b</sup> and Ho Seong Lee<sup>a,\*</sup>

<sup>a</sup>*School of Materials Science and Engineering, Kyungpook National University, 80 Daehak-ro, Buk-gu, Daegu 41566, Republic of Korea*

<sup>b</sup>*Korea Electrotechnology Research Institute, 12 Bulmosan-ro 10 beon-gil, Seongsan-gu, Changwon-si, Gyeongsangnam-do, 51543, Republic of Korea*

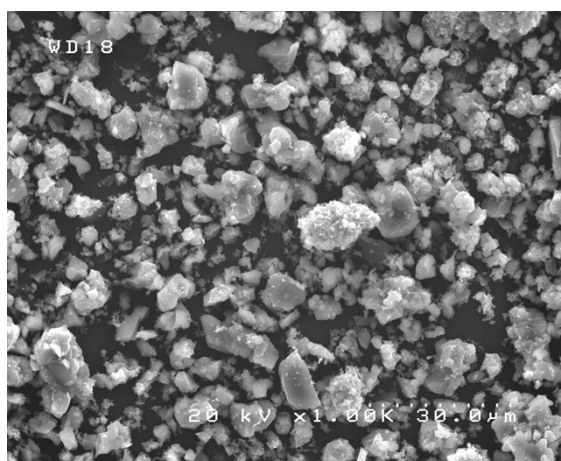

Figure S11. SEM image showing the particle size (1–10  $\mu\text{m}$ ) of pulverized powder.
